# Supplementary material
Source: publisher site journal article supplement (https://www.dovepress.com/article/358807)

A

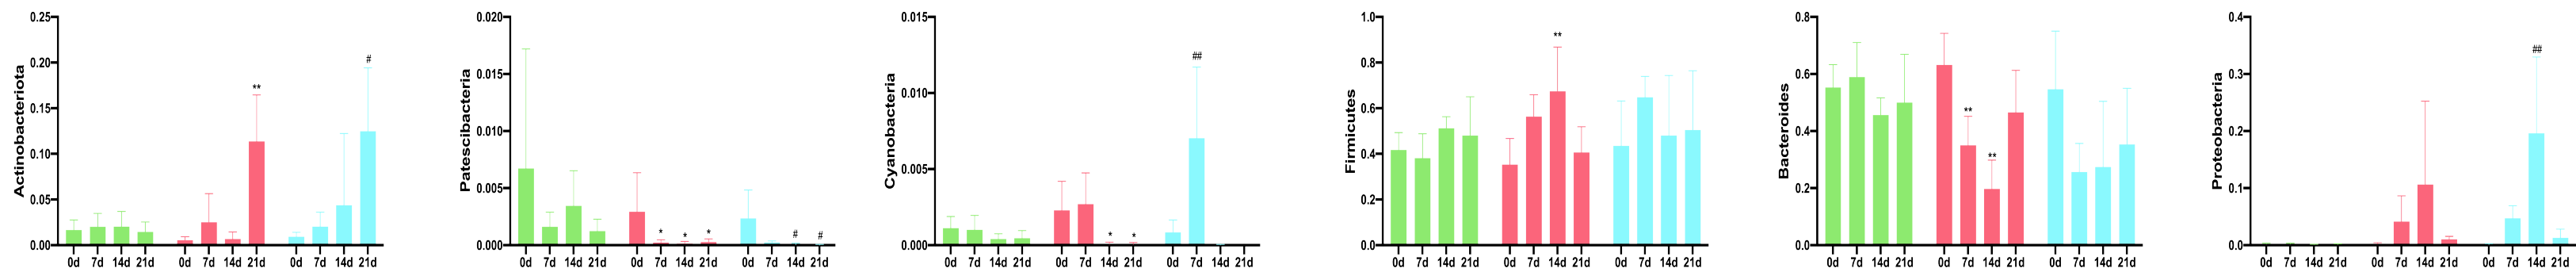

B

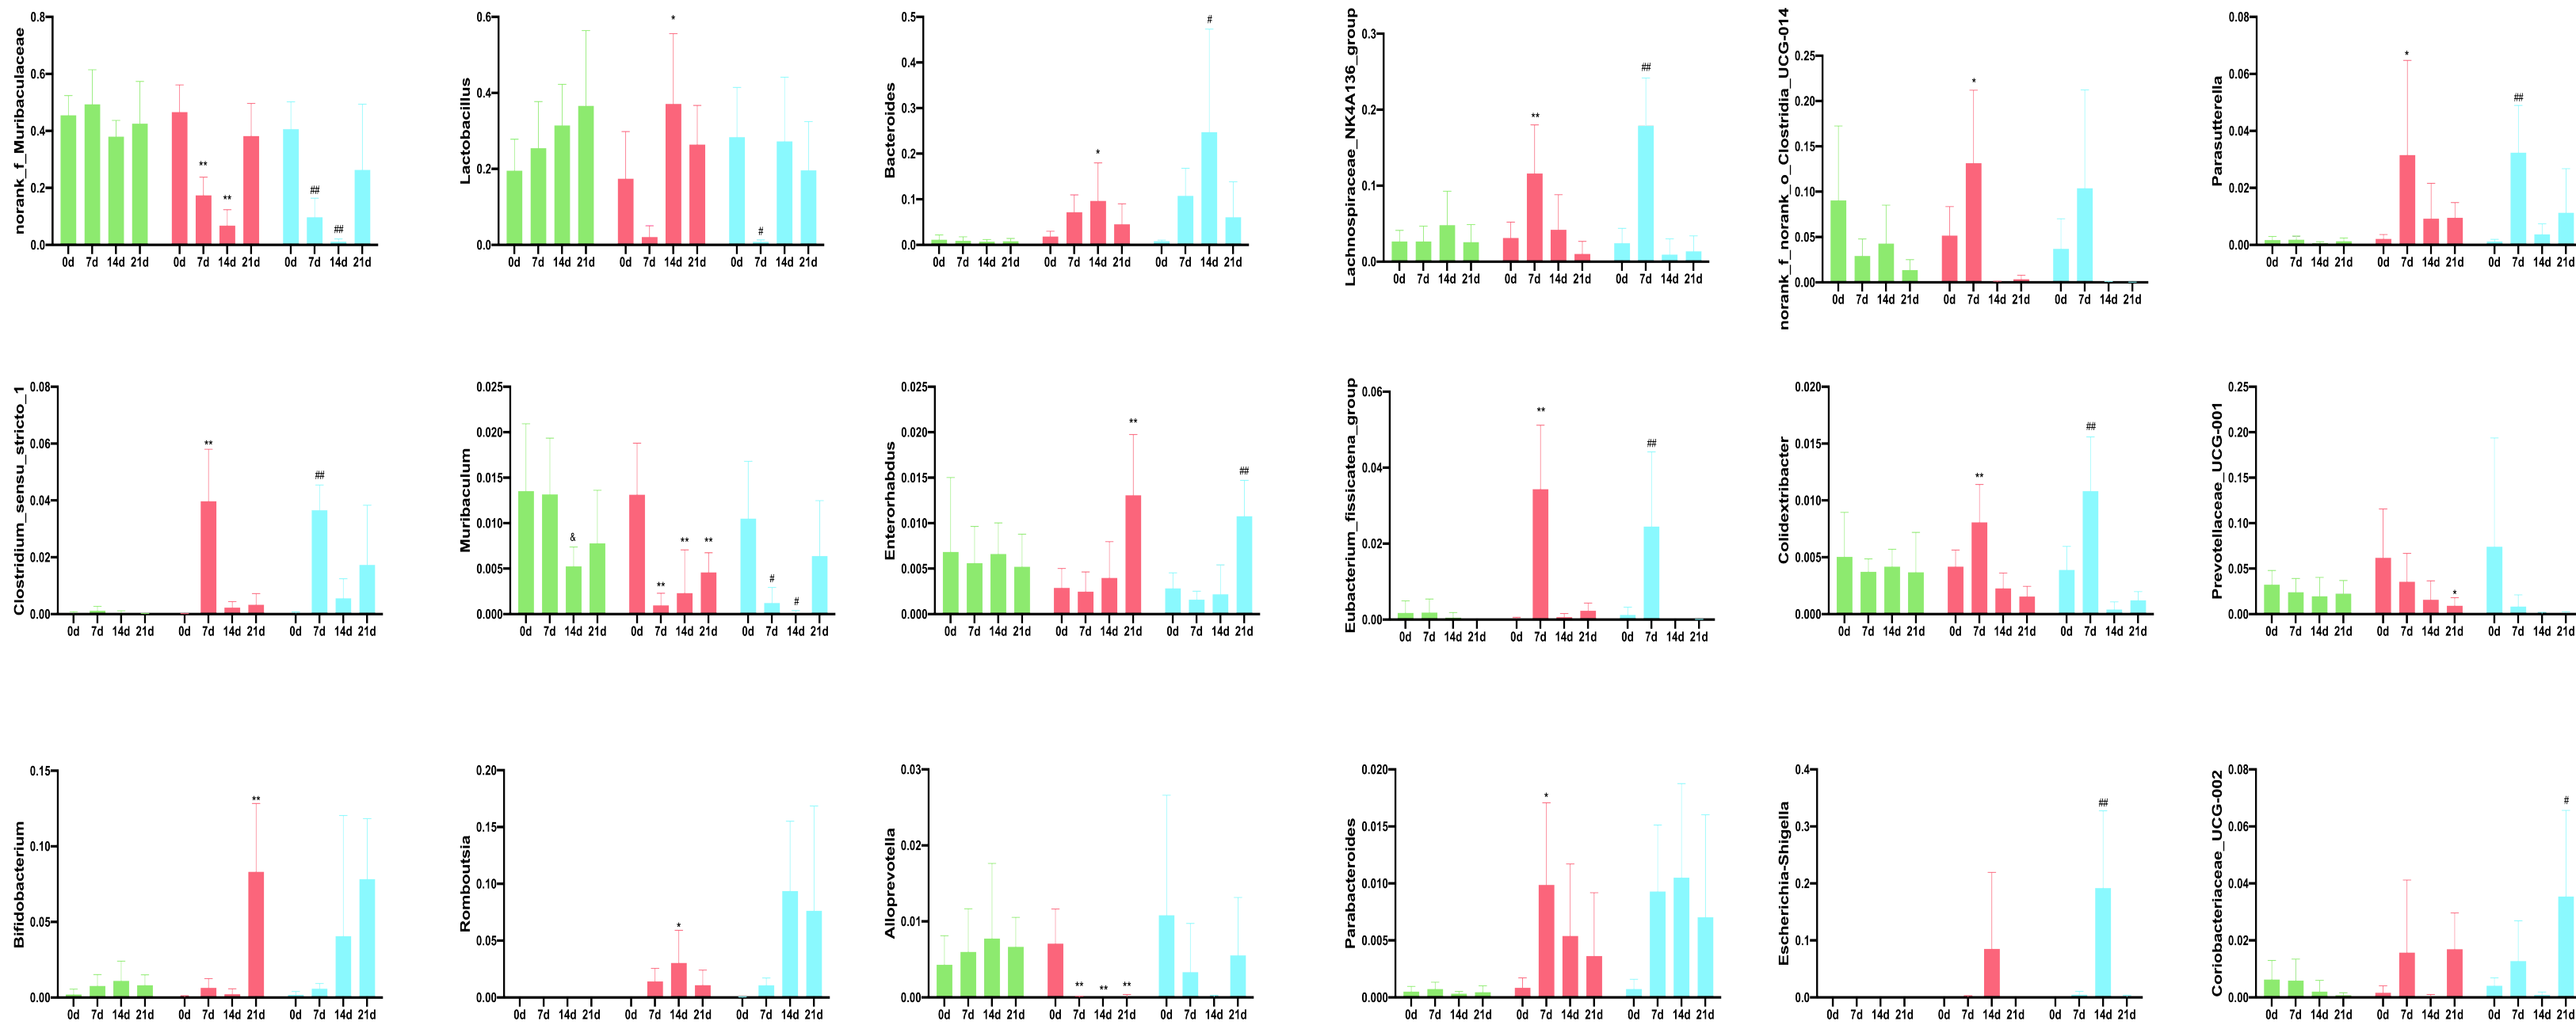

control model25 model30

Supplement: Supplementary file 1 [file 358807 Figure S1.pdf › 358807 Figure S1.pdf]
